# Supplementary figures and images for: Oxidative-Damaged Mitochondria Activate GABARAPL1-Induced NLRP3 Inflammasomes in an Autophagic-Exosome Manner after Acute Myocardial Ischemia
Source: PubMed Central journal article supplement (PMC9553392; doi:10.1155/2022/7958542), 2022-09-30

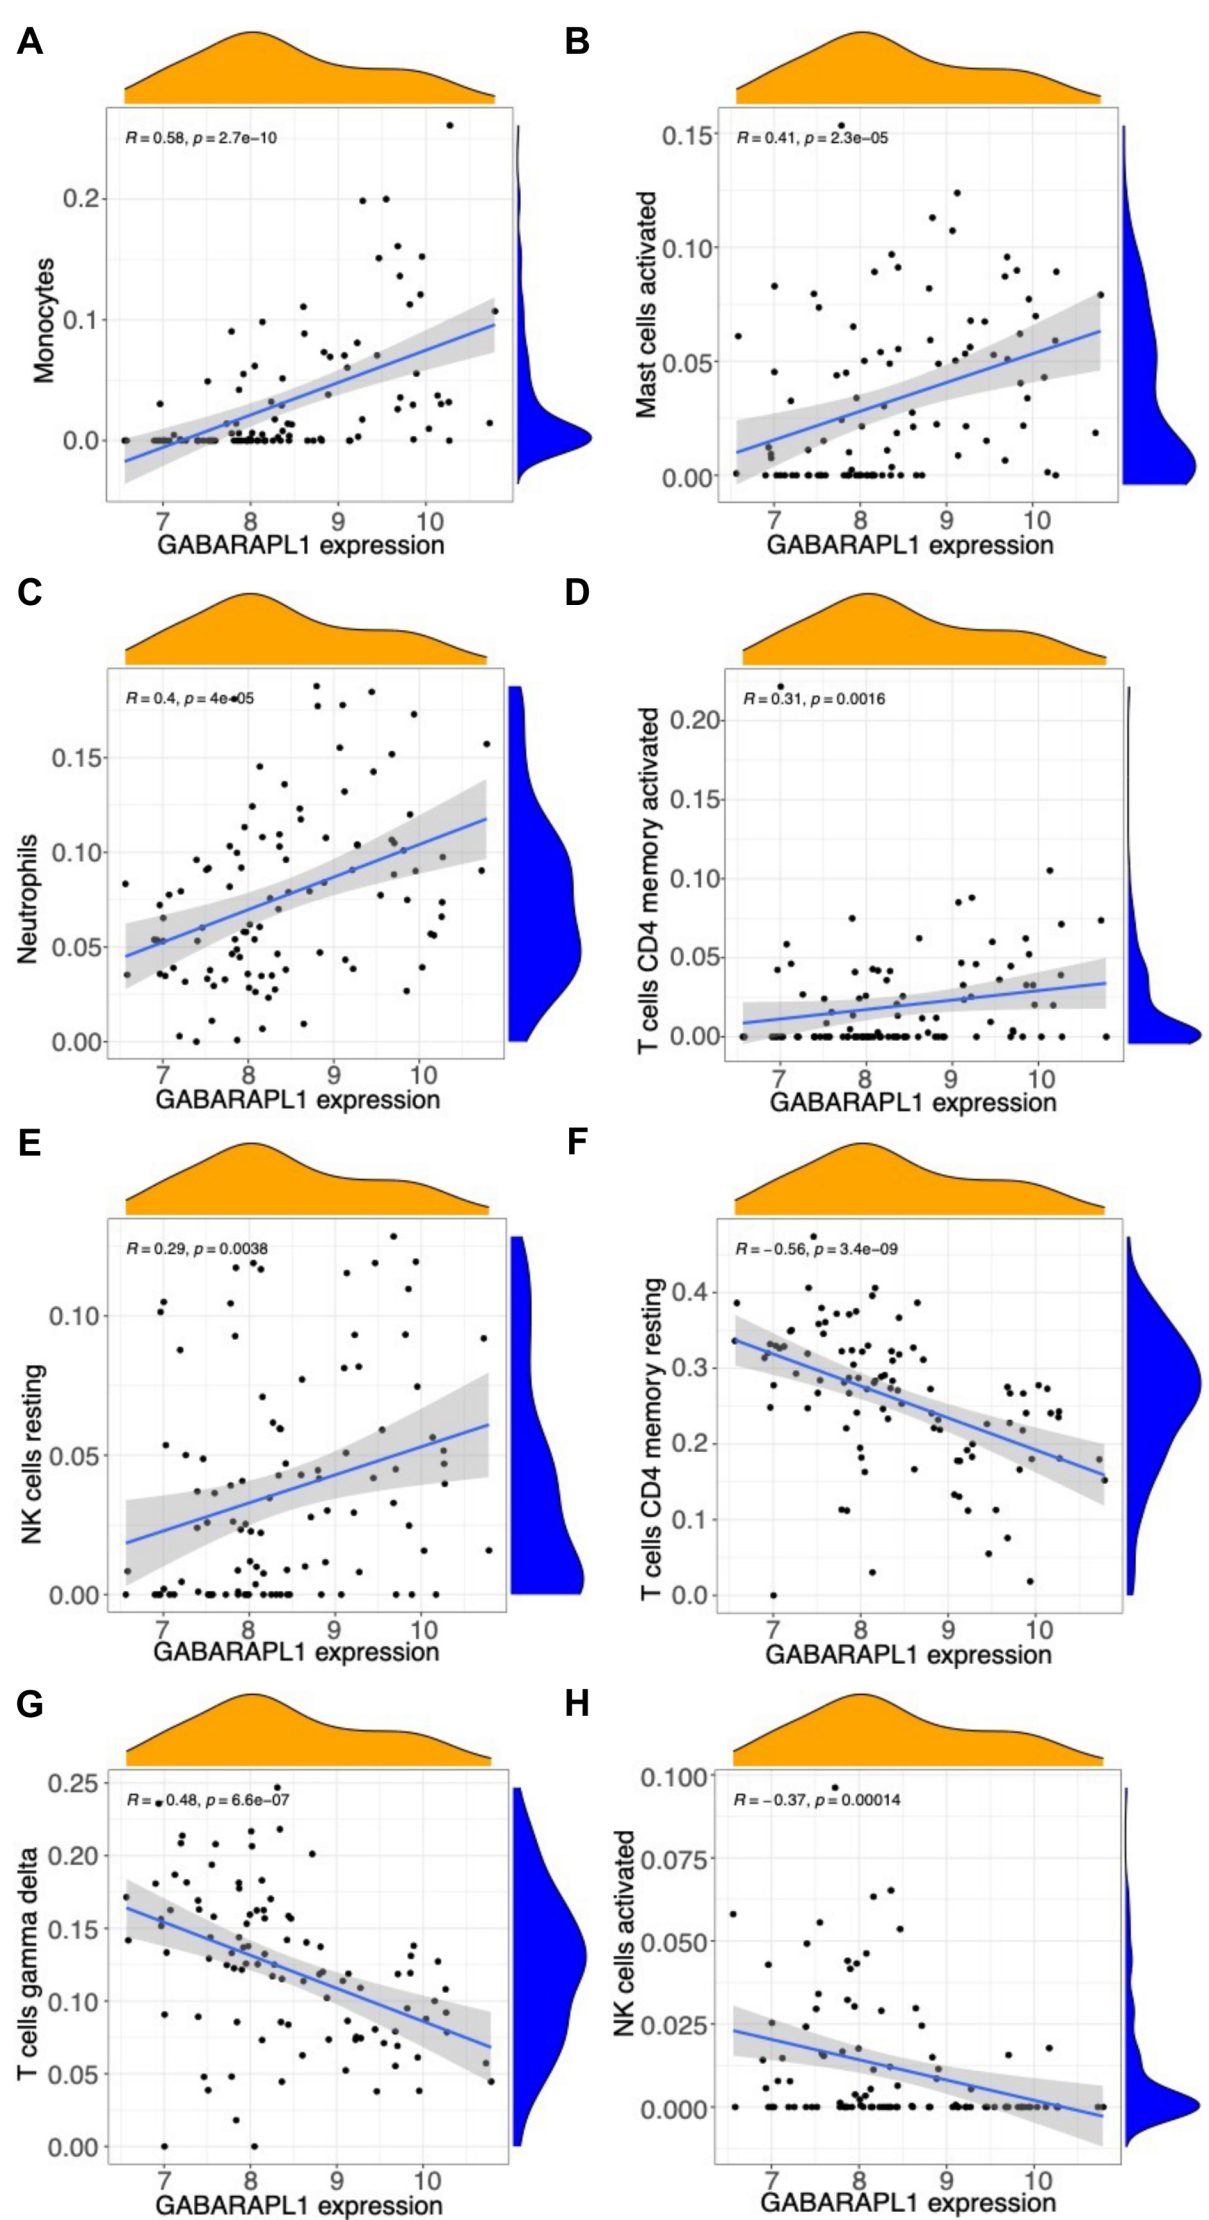

Supplement: 7958542.f1.pdf [file 7958542.f1.pdf]
